# Supplementary material for: Bone Marrow-Derived Mesenchymal Stem Cell Implants for the Treatment of Focal Chondral Defects of the Knee in Animal Models: A Systematic Review and Meta-Analysis
Source: MDPI journal article supplement (doi:10.3390/ijms24043227), 2023-02-06
Supplement: s1 [file s1]

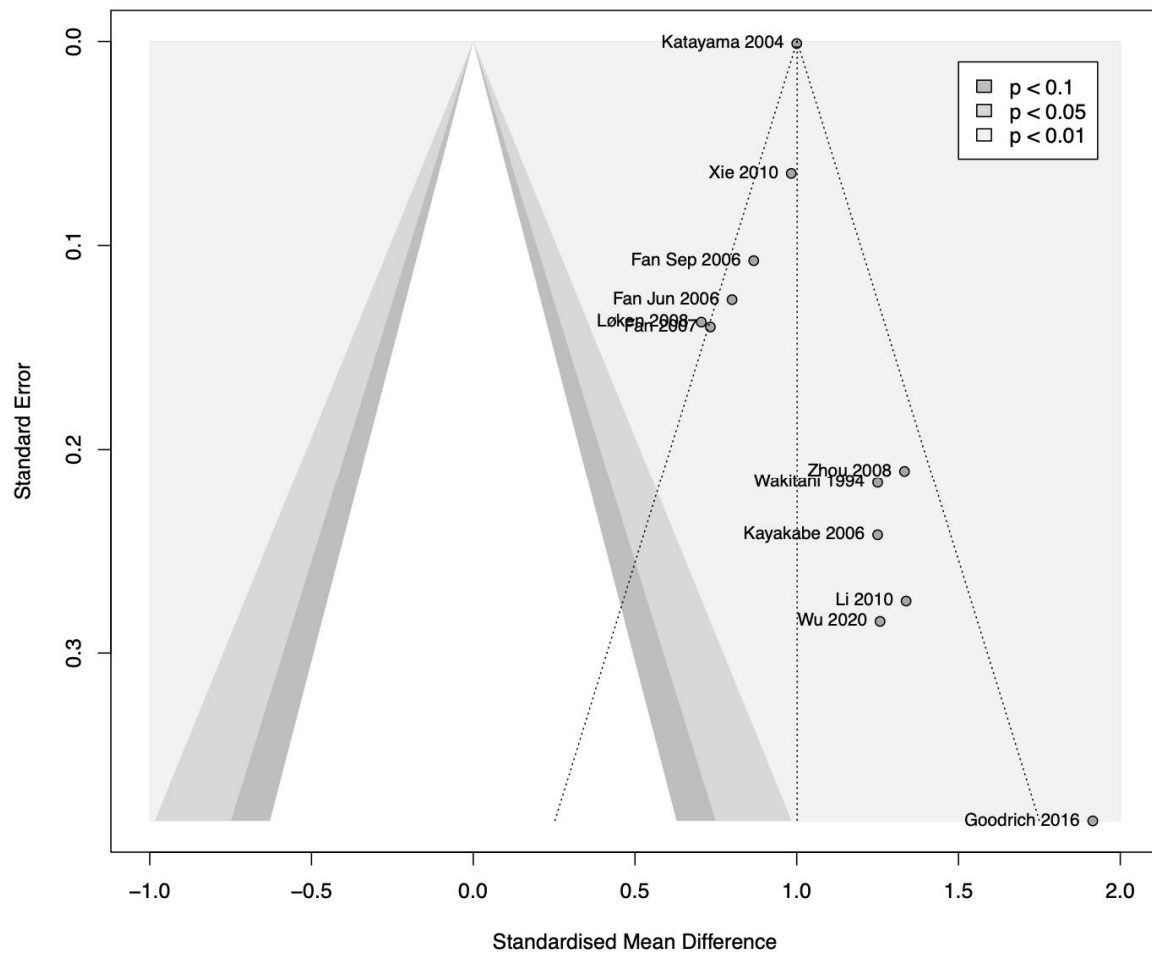

Egger's test of the intercept for publication bias:  $p = 0.82$ .

Egger's test does not indicate the presence of funnel plot asymmetry.

**Supplementary Figure S1.** Contour-enhanced funnel plot for publication bias.
