# Supplementary material for: Bone Marrow-Derived Mesenchymal Stem Cell Implants for the Treatment of Focal Chondral Defects of the Knee in Animal Models: A Systematic Review and Meta-Analysis
Source: MDPI journal article supplement (doi:10.3390/ijms24043227), 2023-02-06
Supplement: s1 [file s1]

**Supplementary Table S1.** Detailed search strategy.

| Knee    | Cartilage variations | Cartilage to implant variations | Defect variations | MSC variations                 | Implant variations | Investigation variations |             |
|---------|----------------------|---------------------------------|-------------------|--------------------------------|--------------------|--------------------------|-------------|
| 1) Knee | 2) Chondral          | 6) Cartilage-                   | 11) Disease       | 16) Mesenchymal stem cell      | 22) Implant        | 27) Interface            | 33) 1 AND 5 |
|         | 3) Cartilage         | cartilage                       | 12) Defect        | 17) MSC                        | 23) Scaffold       | 28) Integration          | AND 10      |
|         | 4) Articular         | 7) Cartilage to                 | 13) Damage        | 18) (BM or bone-marrow or      | 24) Graft          | 29) Histology            | AND 15      |
|         | 5) 2 OR 3 OR 4       | cartilage                       | 14) Lesion        | bone marrow) derived           | 25) Inject         | 30) Arthroscopy          | AND 21      |
|         |                      | 8) Cartilage-                   | 15) 11 OR 12      | 19) Adipose-derived or         | 26) 22 OR 23 OR    | 31) MRI or               | AND 26      |
|         |                      | implant                         | OR 13 OR          | adipose derived or ASC         | 24 OR 25           | magnetic                 | AND 32      |
|         |                      | 9) Cartilage to                 | 14                | 20) (Blood or peripheral blood |                    | resonance                |             |
|         |                      | implant                         |                   | or peripheral-blood or PB)     |                    | imaging                  |             |
|         |                      | 10) 6 OR 7 OR 8 OR              |                   | derived                        |                    | 32) 27 OR 28 OR          |             |
|         |                      | 9                               |                   | 21) 16 OR 17 OR 18 OR 19 OR    |                    | 29 OR 30 OR              |             |
|         |                      |                                 |                   | 20                             |                    | 31                       |             |
